# Supplementary material for: The incidence of sore throat and group A streptococcal pharyngitis in children at high risk of developing acute rheumatic fever: A systematic review and meta-analysis
Source: PubMed Central journal article supplement (PMC7673496; doi:10.1371/journal.pone.0242107), 2020-11-18
Supplement: pone.0242107.s002.pdf [file pone.0242107.s002.pdf]

| Study ID            | Year | Reason for Exclusion                                                                                                                                                                                                            |
|---------------------|------|---------------------------------------------------------------------------------------------------------------------------------------------------------------------------------------------------------------------------------|
| Nicolle 1988 [38]   | 1988 | Prevalence study only included pharyngeal carriage not pharyngitis. Appears to use the same data as Nicolle 1990                                                                                                                |
| Sarkar 1988 [39]    | 1988 | Three-point prevalence studies conducted over one year to analyse the change with season.                                                                                                                                       |
| Rotta 1989 [34]     | 1989 | Does not distinguish between children and adults                                                                                                                                                                                |
| Nicolle 1990 [40]   | 1990 | Reports prevalence of GAS pharyngitis and outcome of antibiotic therapy.                                                                                                                                                        |
| Tewodros 1992 [41]  | 1992 | Prevalence study conducted through outpatient clinics                                                                                                                                                                           |
| Majeed 1993 [42]    | 1993 | High income country                                                                                                                                                                                                             |
| Smeesters 2006 [43] | 2006 | Prevalence study, no follow up period                                                                                                                                                                                           |
| Tartof 2011 [44]    | 2011 | Period prevalence, no follow up period for each child                                                                                                                                                                           |
| Tapia 2015[45]      | 2015 | Appropriate prospective surveillance study; however, doesn't report denominator of children surveyed so incidence cannot be calculated. We attempted to contact the authors to obtain this information but were not successful. |
| Shay 2017 [46]      | 2017 | Reports incidence but calculated through a retrospective survey with no follow up period. Also, high income country with no Indigenous population specifically identified.                                                      |
